# Supplementary material for: Primary glia cells from bank vole propagate multiple rodent-adapted scrapie prions
Source: Springer Nature journal article supplement (doi:10.1038/s41598-022-06198-4), 2022-02-09
Supplement: 41598_2022_6198_MOESM1_ESM.pdf [file 41598_2022_6198_MOESM1_ESM.pdf]

# **Primary glia cells from bank vole propagate multiple rodent-adapted scrapie prions**

Karla A. Schwenke, Joo-Hee Wälzlein, Agnieszka Bauer, Achim Thomzig, Michael Beekes

Supplementary Information

# 1) Relative Quantification of proteinase-resistant PrP in Initial Inocula

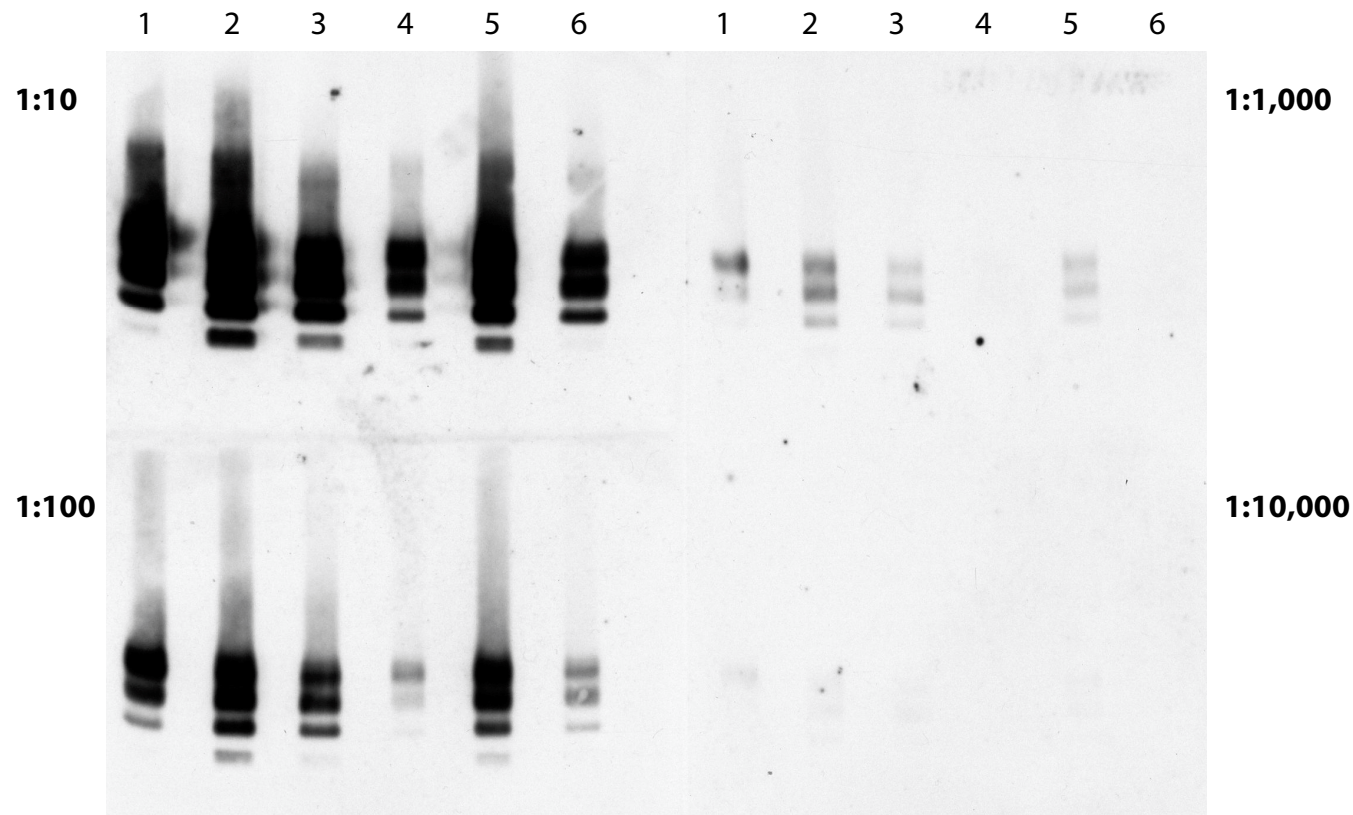

- 1 – 263K
- 2 – BL6-22L
- 3 – BL6-RML
- 4 – BV-RML
- 5 – BL6-ME7
- 6 – BV-ME7

Inocula as 10% (w/v) brain homogenates, proteinase K-treated (75 µg/ml, 37 °C, 1h), diluted in Sample Loading Buffer as indicated. Lanes between samples were left blank.

mAb: ICSM-18 (1:4,000)

## 2) Proteinase K digestion of cell lysates with lower concentrations

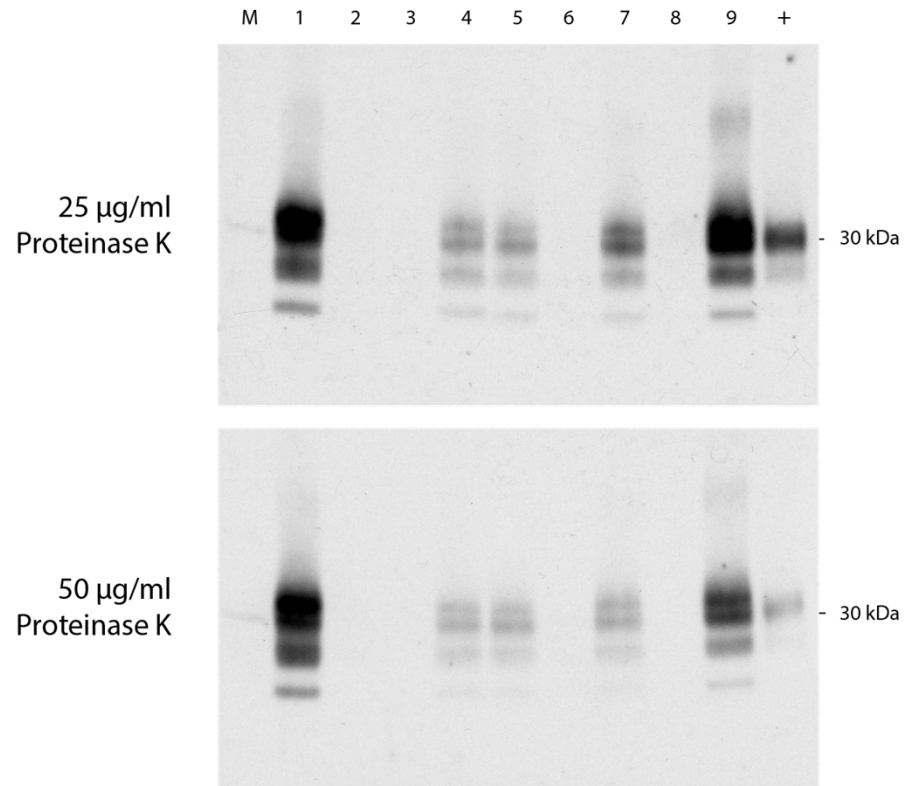

### Cell lysates 60 dpe

- 1 - BL6-Glia + BL6-22L
- 2 - BL6-Glia + BL6-RML
- 3 - BL6-Glia + BL6-ME7
- 4 - BV-Glia + BL6-22L
- 5 - BV-Glia + BL6-RML
- 6 - BV-Glia + BL6-ME7
- 7 - BV-Glia + BV-RML
- 8 - BV-Glia + BV-ME7
- 9 - BV-Glia + Ha-263K

+ 263K 10% brain homogenate (1:1,000)

M Low Molecular Weight Marker

PK digestion: 25 or 50 µg/ml PK, 37 °C, 1 h  
mAb: ICSM-18 (1:4,000)

### 3) Untreated and Proteinase K-treated cell lysates

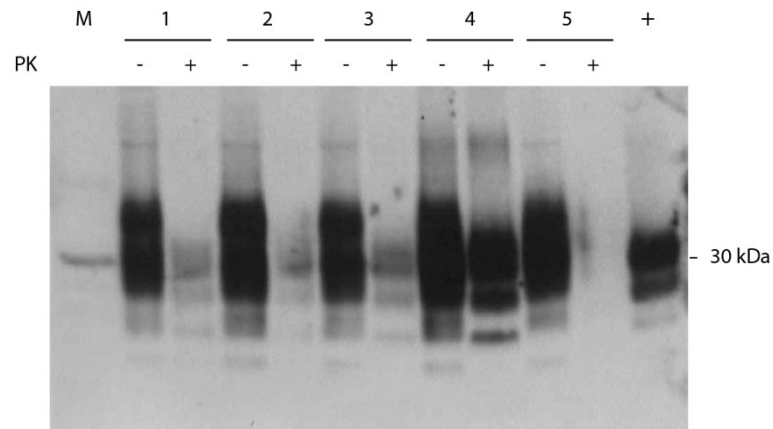

#### BV-Glia cell lysates at 60 dpe

- 1 - BL6-22L
- 2 - BL6-RML
- 3 - BV-RML
- 4 - Ha-263K
- 5 - NBH

+ 263K 10% brain homogenate (1:1,000)

M Low Molecular Weight Marker

PK digestion: 75µg/ml PK, 37 °C, 1 h

mAb: ICSM-18 (1:4,000)

#### 4) BV-Glia infected with 263K – Comparison of mAb ICSM-18 and 3F4

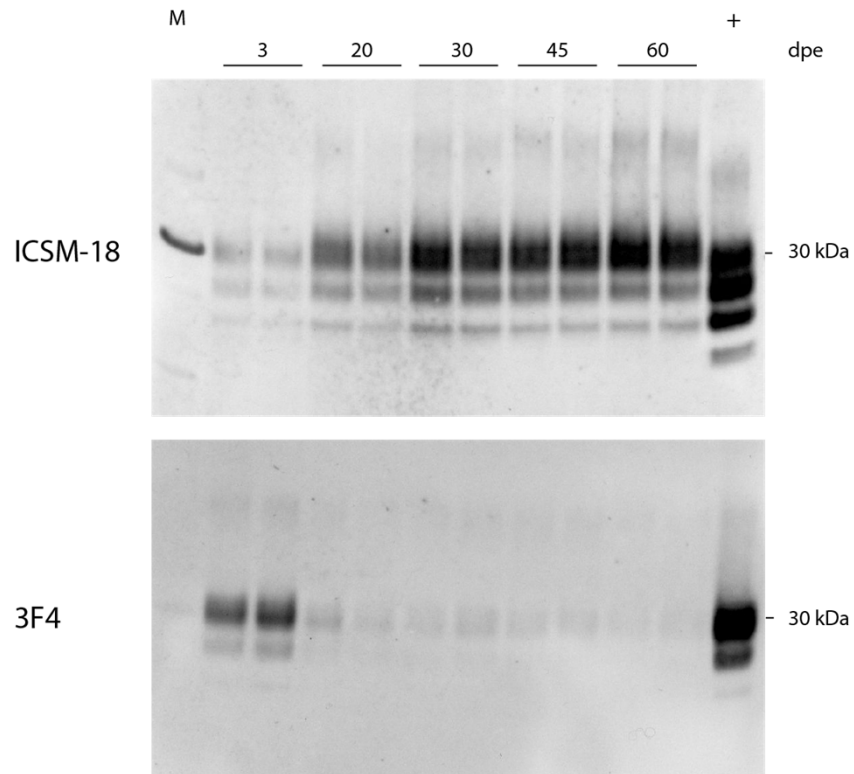

Samples blotted with

- mAb ICSM-18 (1:4,000) for murine PrP
- mAb 3F4 (1:2,000) for hamster PrP (of residual inoculum)

+ - 139A (1:100) for ICSM-18

+ - 263K (1:1,000) for 3F4

## 5) Comparison of relative PrP<sup>C</sup> levels in glia cells and bank vole brain homogenate

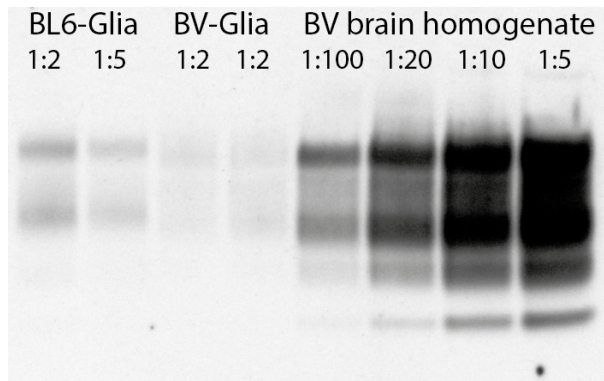

Dilutions of cell lysates of uninfected BL6-Glia and BV-Glia (each confluent grown 6-wells lysed in 100  $\mu$ l Sarcosyl) in comparison to a diluted 10% bank vole-brain homogenate

- Dilutions in sample loading buffer as stated
- 10  $\mu$ l per dilution loaded on gel
- Blot stained with mAb ICSM-18 (1:4,000)

→ BL6-Glia exhibit more PrP<sup>C</sup> than the BV-Glia

## 6) BV-Glia infected with BV-RML – all replicate experiments

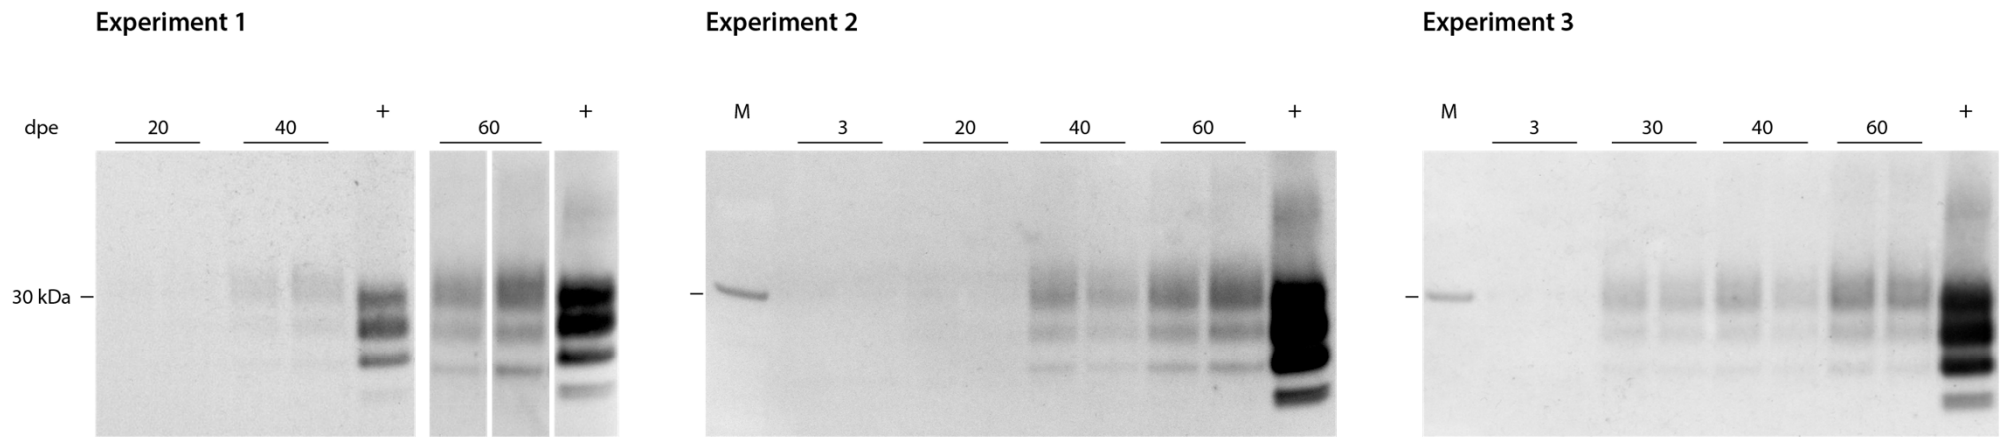

M Low Molecular Weight Marker  
+ 139A 10% brain homogenate (1:100)

PK digestion: 75 µg/ml PK, 37 °C, 1 h  
mAb: ICSM-18 (1:4,000)

## 7) Complete Blots of Figure 2

**Fig. 2 A**

BL6-Glia infected with BL6-22L  
3-60 dpe

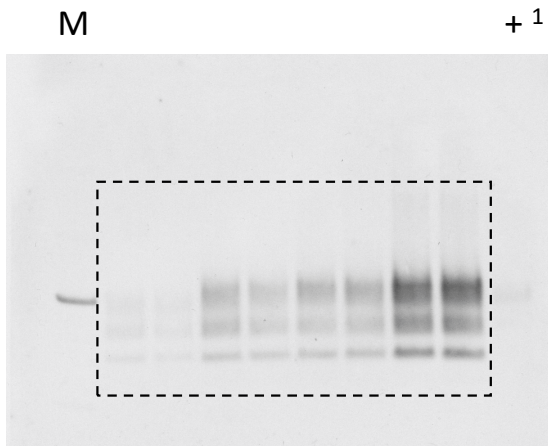

BL6-Glia infected with BL6-22L  
60 dpe, deglycosylated (-/+)

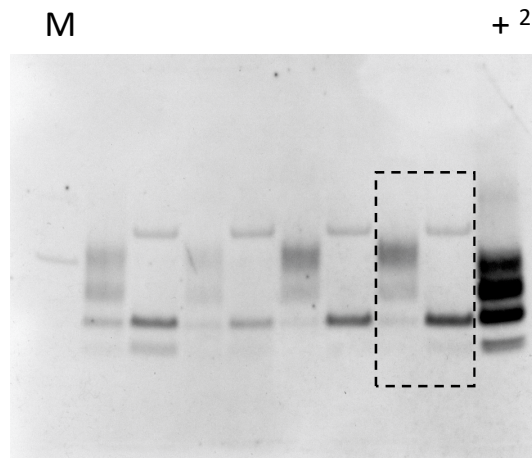

**Fig. 2 B**

BL6-Glia infected with BL6-RML  
3-60 dpe

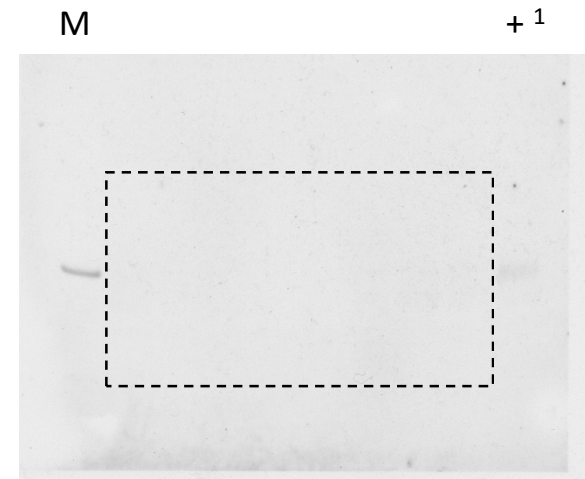

M – Low Molecular Weight Marker

+ – Loading control: 263K<sup>1</sup> / 139A<sup>2</sup> 10% brain homogenate (diluted 10<sup>-4</sup> / 10<sup>-2</sup>)



## 7) Complete Blots of Figure 2

**Fig. 2 C**

BV-Glia infected with BL6-22L  
3-60 dpe

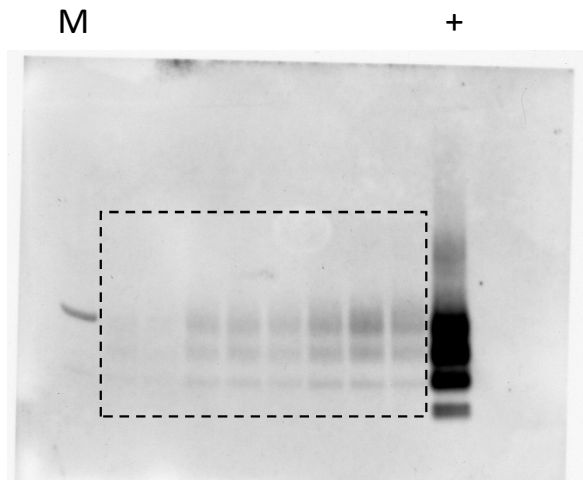

BV-Glia infected with BL6-22L  
60 dpe, deglycosylated (-/+)

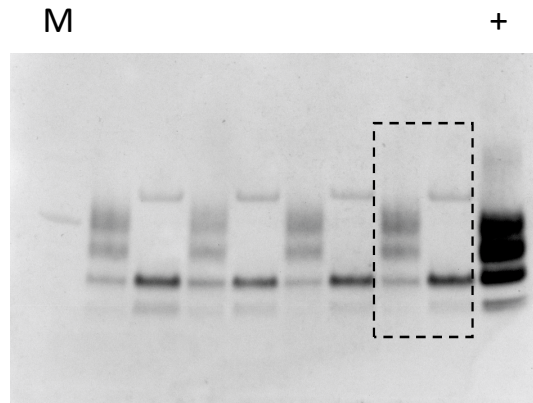

**Fig. 2 D**

BV-Glia infected with BL6-RML  
3-60 dpe

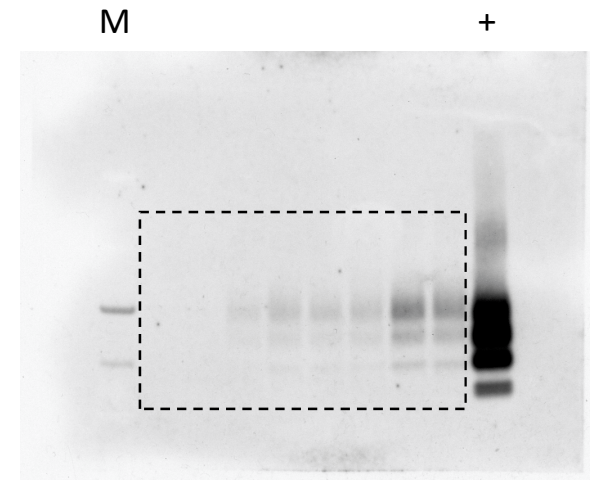

M – Low Molecular Weight Marker

+ – Loading control: 139A 10% brain homogenate (1:100)

## 7) Complete Blots of Figure 2

**Fig. 2 E**

BV-Glia infected with BV-RML  
3-60 dpe

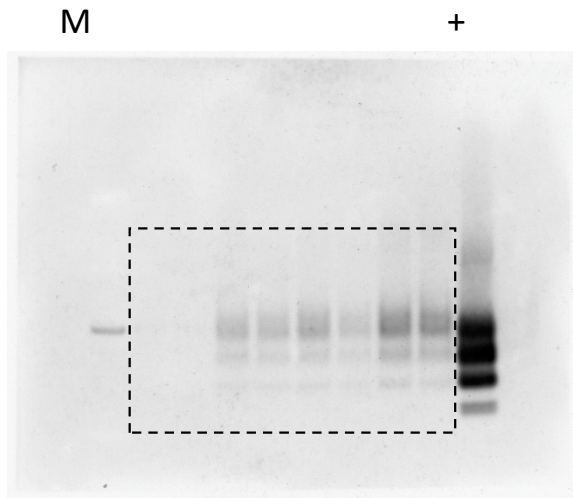

BV-Glia infected with BV-RML  
60 dpe, deglycosylated (-/+)

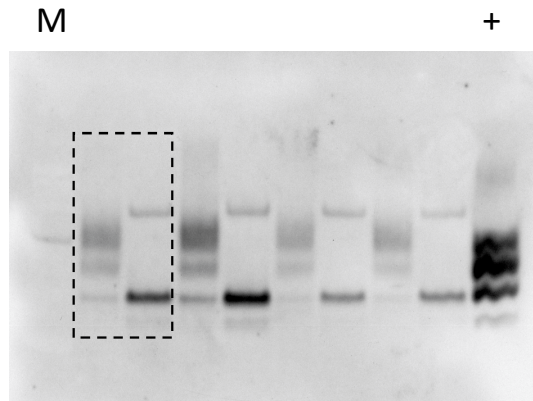

**Fig. 2 F**

BV-Glia infected with 263K  
3-60 dpe

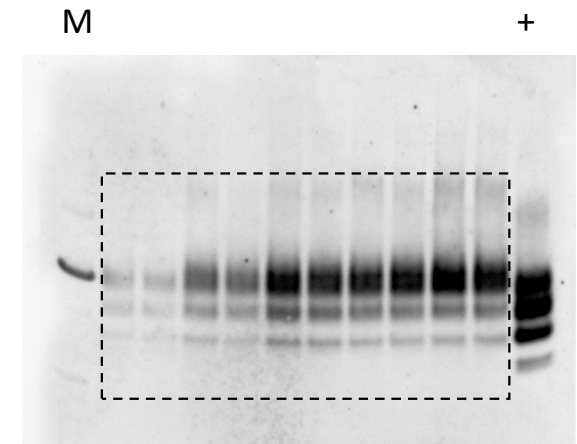

M – Low Molecular Weight Marker

+ – Loading control: 139A 10% brain homogenate (1:100)
